# Supplementary material for: Metabolite Support of Long-Term Storage of Sperm in the Spermatheca of Honeybee (Apis mellifera) Queens
Source: Front Physiol. 2020 Nov 10;11:574856. doi: 10.3389/fphys.2020.574856 (PMC7683436; doi:10.3389/fphys.2020.574856)
Supplement: Supplementary Table 4 — Pearson’s coefficients of correlation between metabolites in NLQS and VQS. [file Table_4.XLSX]

## Sheet: NLQS_VQS
TABLE S4| Correlation coefficient of metabolites.
	SM(d18:1/16:0)	PI(16:1(9Z)/0:0)	PI(18:1(9Z)/0:0)	(5-butyl-6-methyloctahydroindolizin-8-yl)methanol	N-methylundec-10-enamide	PC(18:4(6Z,9Z,12Z,15Z)/16:0)	LysoPE(0:0/18:1(11Z))	PC(18:1(11Z)/18:3(6Z,9Z,12Z))	PC(16:0/18:3(6Z,9Z,12Z))	PC(18:2(9Z,12Z)/18:3(9Z,12Z,15Z))	PC(18:1(6Z)/0:0)	PC(18:1(11Z)/0:0)	arabinofuranosylguanine	N'-nitrosoanabasine	PC(18:1(9Z)/16:1(9Z))	PE(15:0/20:1(11Z))	L-2-Amino-5-hydroxypentanoic acid	N-(1-Deoxy-1-fructosyl)leucine	(S)-2-Hydroxyglutarate	Glycerophosphocholine	Pyro-L-glutaminyl-L-glutamine	PC(18:2(9Z,12Z)/18:4(6Z,9Z,12Z,15Z))	trans-Cinnamic acid	L-Isoleucine	3-Hydroxychavicol 1-[rhamnosyl-(1->6)-glucoside]	Isoswertisin 2''-O-(2'''-methylbutyrate)	FAD	Phosphocholine	3,4,5-trihydroxy-6-{[5-(4-methoxyphenyl)-3-oxopentan-2-yl]oxy}oxane-2-carboxylic acid	PC(O-18:0/0:0)	PC(O-18:1(11Z)/0:0)	LysoPC(P-18:0)	1-Stearoylglycerophosphoinositol	PI(18:0/0:0)	LysoPE(18:0/0:0)	LysoPE(18:1(11Z)/0:0)	LysoPE(0:0/18:0)	enantio-PAF C-16	L-a-Lysophosphatidylserine	LysoPC(0:0/16:0)	LysoPC(18:0)	LysoPC(16:1(9Z)/0:0)	Methoxyzotepine	13R-HODE	LysoPC(18:1(9Z))	MG(0:0/18:3(9Z,12Z,15Z)/0:0)	LysoPE(18:3(9Z,12Z,15Z)/0:0)	LysoPC(18:3(6Z,9Z,12Z))	PC(18:3(9Z,12Z,15Z)/0:0)
SM(d18:1/16:0)	1	0.758724	0.763188	0.794281	0.789413	-0.370613	-0.30395	-0.285205	-0.346685	-0.505271	-0.452428	-0.528907	-0.768128	-0.69052	-0.512761	-0.529307	-0.730486	-0.762334	-0.734326	-0.713607	-0.714281	-0.594525	-0.664309	-0.687935	-0.686195	-0.679294	-0.737461	-0.716481	-0.692911	-0.528032	-0.587016	-0.601703	-0.474266	-0.423929	-0.50344	-0.503691	-0.473346	-0.546036	-0.491857	-0.488732	-0.609048	-0.656033	-0.785324	-0.650997	-0.727382	-0.653216	-0.621187	-0.700128	-0.663597
PI(16:1(9Z)/0:0)	0.758724	1	0.963226	0.979941	0.982614	-0.652229	-0.610161	-0.731945	-0.746617	-0.857266	-0.796505	-0.82443	-0.786719	-0.85791	-0.732743	-0.731449	-0.903483	-0.972028	-0.92146	-0.933151	-0.933558	-0.937348	-0.923006	-0.919967	-0.935673	-0.916096	-0.960765	-0.966067	-0.965082	-0.59584	-0.68973	-0.701131	-0.655673	-0.623516	-0.660132	-0.662939	-0.588345	-0.717869	-0.650536	-0.641136	-0.869736	-0.872729	-0.975515	-0.970298	-0.971114	-0.981689	-0.945993	-0.980378	-0.963998
PI(18:1(9Z)/0:0)	0.763188	0.963226	1	0.981305	0.982701	-0.771509	-0.745926	-0.800783	-0.841819	-0.92464	-0.868519	-0.903511	-0.8646	-0.959545	-0.868556	-0.873803	-0.965787	-0.990463	-0.979715	-0.985938	-0.985988	-0.963015	-0.970985	-0.98076	-0.985361	-0.979411	-0.990629	-0.992176	-0.985144	-0.408246	-0.504279	-0.519225	-0.437588	-0.400451	-0.450957	-0.460336	-0.367945	-0.515425	-0.432945	-0.423242	-0.720986	-0.717529	-0.920424	-0.944366	-0.902262	-0.941334	-0.879848	-0.913594	-0.876509
(5-butyl-6-methyloctahydroindolizin-8-yl)methanol	0.794281	0.979941	0.981305	1	0.998359	-0.700258	-0.653652	-0.762562	-0.780468	-0.876855	-0.811379	-0.846187	-0.84502	-0.91182	-0.786592	-0.787546	-0.930368	-0.978585	-0.937214	-0.947228	-0.945338	-0.940899	-0.925604	-0.935474	-0.943851	-0.930685	-0.962061	-0.967835	-0.960816	-0.531109	-0.6243	-0.636877	-0.556585	-0.521072	-0.583489	-0.59914	-0.506905	-0.636621	-0.559857	-0.552066	-0.801447	-0.809114	-0.958611	-0.941888	-0.953596	-0.955625	-0.908001	-0.945775	-0.919126
N-methylundec-10-enamide	0.789413	0.982614	0.982701	0.998359	1	-0.702438	-0.655612	-0.761439	-0.78094	-0.879546	-0.814277	-0.849023	-0.844638	-0.913152	-0.789733	-0.790263	-0.933269	-0.981794	-0.941069	-0.950889	-0.949252	-0.943959	-0.930003	-0.938957	-0.947636	-0.934465	-0.965932	-0.971463	-0.964658	-0.533442	-0.626794	-0.639424	-0.561325	-0.525677	-0.586156	-0.600285	-0.509053	-0.639826	-0.563646	-0.555819	-0.805692	-0.81317	-0.9616	-0.944722	-0.956578	-0.959428	-0.910928	-0.949843	-0.922952
PC(18:4(6Z,9Z,12Z,15Z)/16:0)	-0.370613	-0.652229	-0.771509	-0.700258	-0.702438	1	0.811223	0.82011	0.855364	0.914182	0.806321	0.818046	0.753212	0.842402	0.947331	0.924094	0.822818	0.766743	0.812304	0.827448	0.813071	0.784374	0.80052	0.820462	0.809356	0.828538	0.767874	0.775803	0.763949	0.0419267	0.112555	0.131431	0.0487932	0.0338277	0.0310321	0.0710992	-0.0315306	0.102534	0.0268197	0.0106625	0.315935	0.327519	0.609389	0.734247	0.570881	0.67602	0.582694	0.580159	0.537608
LysoPE(0:0/18:1(11Z))	-0.30395	-0.610161	-0.745926	-0.653652	-0.655612	0.811223	1	0.902573	0.948127	0.872038	0.954504	0.940132	0.512632	0.812677	0.85392	0.869336	0.734266	0.699849	0.772817	0.782777	0.793424	0.832084	0.840446	0.834412	0.818147	0.825528	0.763209	0.770078	0.77493	-0.177611	-0.0779032	-0.0732542	-0.0953965	-0.117377	-0.074413	-0.0622233	-0.20039	-0.0306202	-0.121531	-0.128343	0.306872	0.214042	0.475085	0.679607	0.537559	0.682003	0.651233	0.594311	0.55177
PC(18:1(11Z)/18:3(6Z,9Z,12Z))	-0.285205	-0.731945	-0.800783	-0.762562	-0.761439	0.82011	0.902573	1	0.984277	0.935308	0.93949	0.924449	0.538487	0.805743	0.819118	0.81373	0.736508	0.759309	0.763763	0.800262	0.801626	0.912497	0.837508	0.829061	0.839829	0.83257	0.797379	0.817094	0.831667	0.0447267	0.154366	0.161987	0.174703	0.161115	0.209319	0.224438	0.076894	0.235003	0.153409	0.153309	0.534347	0.448282	0.617841	0.810246	0.713841	0.813102	0.778587	0.7363	0.710937
PC(16:0/18:3(6Z,9Z,12Z))	-0.346685	-0.746617	-0.841819	-0.780468	-0.78094	0.855364	0.948127	0.984277	1	0.958067	0.966408	0.96005	0.610134	0.86828	0.887742	0.889917	0.801601	0.801792	0.830861	0.856507	0.859768	0.927821	0.890006	0.88643	0.88959	0.889671	0.845287	0.858038	0.866955	0.00148206	0.109202	0.118992	0.106577	0.0869459	0.129695	0.141857	0.00263189	0.171237	0.0840034	0.0795603	0.483964	0.406223	0.630283	0.817293	0.69344	0.809954	0.760678	0.728392	0.691458
PC(18:2(9Z,12Z)/18:3(9Z,12Z,15Z))	-0.505271	-0.857266	-0.92464	-0.876855	-0.879546	0.914182	0.872038	0.935308	0.958067	1	0.941756	0.955448	0.753418	0.919586	0.934967	0.925852	0.897205	0.906931	0.9187	0.941824	0.938393	0.961044	0.945031	0.946516	0.954677	0.95471	0.929723	0.935919	0.937924	0.183579	0.288973	0.305213	0.274732	0.250155	0.2758	0.286863	0.17096	0.332562	0.25112	0.243266	0.598094	0.56173	0.778559	0.919159	0.798799	0.887876	0.824096	0.821765	0.785073
PC(18:1(6Z)/0:0)	-0.452428	-0.796505	-0.868519	-0.811379	-0.814277	0.806321	0.954504	0.93949	0.966408	0.941756	1	0.990335	0.587057	0.861144	0.853588	0.86256	0.819231	0.837482	0.865491	0.884736	0.894119	0.944946	0.938151	0.9211	0.918822	0.915675	0.889383	0.892128	0.898345	0.0640264	0.182074	0.187687	0.197379	0.173726	0.205527	0.209402	0.0791336	0.251754	0.165702	0.157142	0.562582	0.481315	0.678379	0.851121	0.747472	0.857199	0.8392	0.797022	0.767144
PC(18:1(11Z)/0:0)	-0.528907	-0.82443	-0.903511	-0.846187	-0.849023	0.818046	0.940132	0.924449	0.96005	0.955448	0.990335	1	0.648313	0.893794	0.879772	0.889153	0.850198	0.867914	0.897231	0.913379	0.921628	0.954309	0.953961	0.94378	0.944982	0.942711	0.920868	0.918504	0.923998	0.0818367	0.201346	0.21175	0.203074	0.170032	0.221425	0.216653	0.0886568	0.26247	0.17587	0.172492	0.580399	0.500089	0.709431	0.872276	0.772384	0.866614	0.837648	0.815103	0.774407
arabinofuranosylguanine	-0.768128	-0.786719	-0.8646	-0.84502	-0.844638	0.753212	0.512632	0.538487	0.610134	0.753418	0.587057	0.648313	1	0.902496	0.843449	0.839924	0.930592	0.880946	0.888799	0.873781	0.859168	0.729818	0.784451	0.834318	0.820968	0.835412	0.827324	0.830202	0.79955	0.419017	0.456634	0.478593	0.277098	0.242532	0.278621	0.322197	0.272623	0.369704	0.296883	0.277526	0.44801	0.543767	0.828556	0.730851	0.687399	0.700256	0.57622	0.661369	0.611093
N'-nitrosoanabasine	-0.69052	-0.85791	-0.959545	-0.91182	-0.913152	0.842402	0.812677	0.805743	0.86828	0.919586	0.861144	0.893794	0.902496	1	0.947257	0.956504	0.975426	0.943792	0.97047	0.968427	0.966428	0.915565	0.942235	0.968763	0.958641	0.96545	0.940152	0.947375	0.932761	0.234613	0.313726	0.329182	0.198614	0.165934	0.216242	0.24732	0.145214	0.294361	0.201261	0.187229	0.512021	0.521643	0.814905	0.843536	0.766656	0.835627	0.745281	0.774916	0.725167
PC(18:1(9Z)/16:1(9Z))	-0.512761	-0.732743	-0.868556	-0.786592	-0.789733	0.947331	0.85392	0.819118	0.887742	0.934967	0.853588	0.879772	0.843449	0.947257	1	0.996808	0.91372	0.855859	0.912689	0.918056	0.910939	0.850319	0.892151	0.915809	0.905281	0.925743	0.867565	0.867461	0.852652	0.0324284	0.111768	0.131709	0.0338031	0.0106309	0.0173197	0.0467429	-0.0511573	0.101708	0.0159197	-0.00202707	0.341617	0.348637	0.677413	0.781071	0.62043	0.728579	0.623183	0.640121	0.584845
PE(15:0/20:1(11Z))	-0.529307	-0.731449	-0.873803	-0.787546	-0.790263	0.924094	0.869336	0.81373	0.889917	0.925852	0.86256	0.889153	0.839924	0.956504	0.996808	1	0.91777	0.856864	0.919902	0.921416	0.917118	0.852223	0.900811	0.924489	0.911438	0.93191	0.873235	0.872185	0.857211	0.0130378	0.0928497	0.111715	0.00835493	-0.0174387	-0.00375137	0.0235261	-0.0752889	0.0810145	-0.00765566	-0.0252997	0.330513	0.33155	0.669421	0.771226	0.613016	0.724695	0.621736	0.63765	0.580064
L-2-Amino-5-hydroxypentanoic acid	-0.730486	-0.903483	-0.965787	-0.930368	-0.933269	0.822818	0.734266	0.736508	0.801601	0.897205	0.819231	0.850198	0.930592	0.975426	0.91372	0.91777	1	0.976197	0.98999	0.982151	0.978393	0.904964	0.948245	0.971524	0.958563	0.96303	0.955338	0.96252	0.944124	0.390605	0.459287	0.47359	0.335101	0.303274	0.328926	0.362364	0.284542	0.422165	0.33703	0.315507	0.585291	0.62627	0.88983	0.874816	0.806856	0.868784	0.782223	0.820536	0.780982
N-(1-Deoxy-1-fructosyl)leucine	-0.762334	-0.972028	-0.990463	-0.978585	-0.981794	0.766743	0.699849	0.759309	0.801792	0.906931	0.837482	0.867914	0.880946	0.943792	0.855859	0.856864	0.976197	1	0.98314	0.987192	0.985168	0.946708	0.965531	0.974251	0.975454	0.970853	0.986743	0.988574	0.977054	0.479444	0.567706	0.581434	0.496852	0.464702	0.489978	0.507021	0.428659	0.567881	0.490259	0.472977	0.734723	0.756813	0.951173	0.946469	0.906838	0.944778	0.881616	0.919023	0.888936
(S)-2-Hydroxyglutarate	-0.734326	-0.92146	-0.979715	-0.937214	-0.941069	0.812304	0.772817	0.763763	0.830861	0.9187	0.865491	0.897231	0.888799	0.97047	0.912689	0.919902	0.98999	0.98314	1	0.995939	0.996047	0.932758	0.979123	0.991648	0.984032	0.987371	0.982932	0.98139	0.967654	0.348811	0.433927	0.448742	0.347089	0.311733	0.33591	0.351803	0.271845	0.421662	0.338075	0.319309	0.620213	0.635254	0.884946	0.906485	0.82635	0.893919	0.820398	0.8531	0.811513
Glycerophosphocholine	-0.713607	-0.933151	-0.985938	-0.947228	-0.950889	0.827448	0.782777	0.800262	0.856507	0.941824	0.884736	0.913379	0.873781	0.968427	0.918056	0.921416	0.982151	0.987192	0.995939	1	0.999047	0.95262	0.985989	0.994072	0.992056	0.99476	0.990225	0.987407	0.975783	0.340268	0.434035	0.449396	0.372382	0.34063	0.357211	0.371169	0.286544	0.439329	0.357343	0.339046	0.645785	0.654166	0.891473	0.930962	0.847461	0.913734	0.842924	0.871699	0.833
Pyro-L-glutaminyl-L-glutamine	-0.714281	-0.933558	-0.985988	-0.945338	-0.949252	0.813071	0.793424	0.801626	0.859768	0.938393	0.894119	0.921628	0.859168	0.966428	0.910939	0.917118	0.978393	0.985168	0.996047	0.999047	1	0.956014	0.990855	0.99694	0.994618	0.996186	0.992593	0.989486	0.979061	0.33118	0.426623	0.4411	0.36767	0.334891	0.354298	0.365575	0.27985	0.435149	0.352342	0.334753	0.64937	0.65099	0.885841	0.929939	0.847501	0.916376	0.850268	0.87585	0.837237
PC(18:2(9Z,12Z)/18:4(6Z,9Z,12Z,15Z))	-0.594525	-0.937348	-0.963015	-0.940899	-0.943959	0.784374	0.832084	0.912497	0.927821	0.961044	0.944946	0.954309	0.729818	0.915565	0.850319	0.852223	0.904964	0.946708	0.932758	0.95262	0.956014	1	0.970034	0.963966	0.974363	0.962112	0.965544	0.975535	0.980856	0.32922	0.438158	0.448166	0.423395	0.396279	0.438682	0.444336	0.330688	0.490432	0.408234	0.400755	0.739006	0.69529	0.860656	0.955204	0.896916	0.964701	0.924471	0.923417	0.896691
trans-Cinnamic acid	-0.664309	-0.923006	-0.970985	-0.925604	-0.930003	0.80052	0.840446	0.837508	0.890006	0.945031	0.938151	0.953961	0.784451	0.942235	0.892151	0.900811	0.948245	0.965531	0.979123	0.985989	0.990855	0.970034	1	0.994922	0.992798	0.992242	0.987678	0.983274	0.977353	0.284145	0.389644	0.40093	0.360183	0.329556	0.344124	0.34936	0.256062	0.419351	0.336506	0.319234	0.659476	0.637795	0.854777	0.93195	0.843788	0.925822	0.878296	0.884895	0.8509
L-Isoleucine	-0.687935	-0.919967	-0.98076	-0.935474	-0.938957	0.820462	0.834412	0.829061	0.88643	0.946516	0.9211	0.94378	0.834318	0.968763	0.915809	0.924489	0.971524	0.974251	0.991648	0.994072	0.99694	0.963966	0.994922	1	0.995157	0.995816	0.987577	0.987334	0.979042	0.292141	0.388818	0.401644	0.327893	0.29461	0.322962	0.335014	0.24018	0.399928	0.31353	0.297545	0.632523	0.621758	0.860851	0.920207	0.835597	0.913476	0.852745	0.868174	0.828943
3-Hydroxychavicol 1-[rhamnosyl-(1->6)-glucoside]	-0.686195	-0.935673	-0.985361	-0.943851	-0.947636	0.809356	0.818147	0.839829	0.88959	0.954677	0.918822	0.944982	0.820968	0.958641	0.905281	0.911438	0.958563	0.975454	0.984032	0.992056	0.994618	0.974363	0.992798	0.995157	1	0.996671	0.993507	0.993001	0.98949	0.302037	0.404297	0.419064	0.365027	0.332211	0.360758	0.364504	0.270377	0.431773	0.348513	0.336588	0.671498	0.65117	0.87018	0.946542	0.858461	0.931179	0.871237	0.889272	0.851093
Isoswertisin 2''-O-(2'''-methylbutyrate)	-0.679294	-0.916096	-0.979411	-0.930685	-0.934465	0.828538	0.825528	0.83257	0.889671	0.95471	0.915675	0.942711	0.835412	0.96545	0.925743	0.93191	0.96303	0.970853	0.987371	0.99476	0.996186	0.962112	0.992242	0.995816	0.996671	1	0.989234	0.983315	0.975486	0.262617	0.365293	0.380933	0.324748	0.292544	0.31119	0.316576	0.225216	0.387119	0.304082	0.288419	0.625781	0.612777	0.853981	0.927957	0.829028	0.906286	0.839277	0.860905	0.818803
FAD	-0.737461	-0.960765	-0.990629	-0.962061	-0.965932	0.767874	0.763209	0.797379	0.845287	0.929723	0.889383	0.920868	0.827324	0.940152	0.867565	0.873235	0.955338	0.986743	0.982932	0.990225	0.992593	0.965544	0.987678	0.987577	0.993507	0.989234	1	0.994019	0.98847	0.376652	0.480501	0.495321	0.444702	0.408784	0.43731	0.436116	0.35122	0.505854	0.427662	0.414999	0.724194	0.712096	0.907738	0.956527	0.891609	0.944602	0.890766	0.919177	0.883049
Phosphocholine	-0.716481	-0.966067	-0.992176	-0.967835	-0.971463	0.775803	0.770078	0.817094	0.858038	0.935919	0.892128	0.918504	0.830202	0.947375	0.867461	0.872185	0.96252	0.988574	0.98139	0.987407	0.989486	0.975535	0.983274	0.987334	0.993001	0.983315	0.994019	1	0.997349	0.407276	0.502585	0.515779	0.447745	0.413891	0.452737	0.460295	0.369164	0.521646	0.439868	0.429133	0.734725	0.723724	0.914635	0.959879	0.901369	0.958252	0.903185	0.925436	0.893339
3,4,5-trihydroxy-6-{[5-(4-methoxyphenyl)-3-oxopentan-2-yl]oxy}oxane-2-carboxylic acid	-0.692911	-0.965082	-0.985144	-0.960816	-0.964658	0.763949	0.77493	0.831667	0.866955	0.937924	0.898345	0.923998	0.79955	0.932761	0.852652	0.857211	0.944124	0.977054	0.967654	0.975783	0.979061	0.980856	0.977353	0.979042	0.98949	0.975486	0.98847	0.997349	1	0.40158	0.49876	0.511975	0.453873	0.419433	0.465625	0.467317	0.373001	0.527686	0.446653	0.440101	0.753243	0.728404	0.903454	0.966828	0.906037	0.965288	0.914758	0.932928	0.90175
PC(O-18:0/0:0)	-0.528032	-0.59584	-0.408246	-0.531109	-0.533442	0.0419267	-0.177611	0.0447267	0.00148206	0.183579	0.0640264	0.0818367	0.419017	0.234613	0.0324284	0.0130378	0.390605	0.479444	0.348811	0.340268	0.33118	0.32922	0.284145	0.292141	0.302037	0.262617	0.376652	0.407276	0.40158	1	0.98687	0.984207	0.883297	0.868597	0.900202	0.927419	0.950007	0.928909	0.925299	0.917194	0.753782	0.860717	0.715949	0.468785	0.651874	0.541021	0.546805	0.60956	0.646346
PC(O-18:1(11Z)/0:0)	-0.587016	-0.68973	-0.504279	-0.6243	-0.626794	0.112555	-0.0779032	0.154366	0.109202	0.288973	0.182074	0.201346	0.456634	0.313726	0.111768	0.0928497	0.459287	0.567706	0.433927	0.434035	0.426623	0.438158	0.389644	0.388818	0.404297	0.365293	0.480501	0.502585	0.49876	0.98687	1	0.999036	0.931574	0.913886	0.944035	0.961371	0.969359	0.970284	0.961092	0.953432	0.841638	0.928154	0.788943	0.576364	0.749813	0.642191	0.653985	0.712825	0.746159
LysoPC(P-18:0)	-0.601703	-0.701131	-0.519225	-0.636877	-0.639424	0.131431	-0.0732542	0.161987	0.118992	0.305213	0.187687	0.21175	0.478593	0.329182	0.131709	0.111715	0.47359	0.581434	0.448742	0.449396	0.4411	0.448166	0.40093	0.401644	0.419064	0.380933	0.495321	0.515779	0.511975	0.984207	0.999036	1	0.930871	0.91151	0.942921	0.957689	0.966092	0.969246	0.959821	0.953136	0.845561	0.932256	0.799809	0.591203	0.758019	0.64969	0.656023	0.719962	0.750089
1-Stearoylglycerophosphoinositol	-0.474266	-0.655673	-0.437588	-0.556585	-0.561325	0.0487932	-0.0953965	0.174703	0.106577	0.274732	0.197379	0.203074	0.277098	0.198614	0.0338031	0.00835493	0.335101	0.496852	0.347089	0.372382	0.36767	0.423395	0.360183	0.327893	0.365027	0.324748	0.444702	0.447745	0.453873	0.883297	0.931574	0.930871	1	0.995553	0.970547	0.958524	0.973735	0.983782	0.992439	0.984915	0.88695	0.933049	0.720982	0.597162	0.738149	0.636335	0.680089	0.717306	0.764102
PI(18:0/0:0)	-0.423929	-0.623516	-0.400451	-0.521072	-0.525677	0.0338277	-0.117377	0.161115	0.0869459	0.250155	0.173726	0.170032	0.242532	0.165934	0.0106309	-0.0174387	0.303274	0.464702	0.311733	0.34063	0.334891	0.396279	0.329556	0.29461	0.332211	0.292544	0.408784	0.413891	0.419433	0.868597	0.913886	0.91151	0.995553	1	0.953691	0.948402	0.967346	0.972411	0.984241	0.972679	0.859598	0.912465	0.692993	0.571603	0.707038	0.610786	0.656172	0.685796	0.739594
LysoPE(18:0/0:0)	-0.50344	-0.660132	-0.450957	-0.583489	-0.586156	0.0310321	-0.074413	0.209319	0.129695	0.2758	0.205527	0.221425	0.278621	0.216242	0.0173197	-0.00375137	0.328926	0.489978	0.33591	0.357211	0.354298	0.438682	0.344124	0.322962	0.360758	0.31119	0.43731	0.452737	0.465625	0.900202	0.944035	0.942921	0.970547	0.953691	1	0.987967	0.97742	0.985532	0.985539	0.993145	0.914995	0.936917	0.71506	0.584458	0.769929	0.646165	0.693999	0.732966	0.771734
LysoPE(18:1(11Z)/0:0)	-0.503691	-0.662939	-0.460336	-0.59914	-0.600285	0.0710992	-0.0622233	0.224438	0.141857	0.286863	0.209402	0.216653	0.322197	0.24732	0.0467429	0.0235261	0.362364	0.507021	0.351803	0.371169	0.365575	0.444336	0.34936	0.335014	0.364504	0.316576	0.436116	0.460295	0.467317	0.927419	0.961371	0.957689	0.958524	0.948402	0.987967	1	0.982822	0.985712	0.979972	0.98149	0.890904	0.936037	0.734414	0.577248	0.772814	0.650416	0.692448	0.725208	0.76911
LysoPE(0:0/18:0)	-0.473346	-0.588345	-0.367945	-0.506905	-0.509053	-0.0315306	-0.20039	0.076894	0.00263189	0.17096	0.0791336	0.0886568	0.272623	0.145214	-0.0511573	-0.0752889	0.284542	0.428659	0.271845	0.286544	0.27985	0.330688	0.256062	0.24018	0.270377	0.225216	0.35122	0.369164	0.373001	0.950007	0.969359	0.966092	0.973735	0.967346	0.97742	0.982822	1	0.983285	0.992004	0.989062	0.836015	0.903442	0.681106	0.495957	0.685033	0.557817	0.597837	0.642588	0.691816
enantio-PAF C-16	-0.546036	-0.717869	-0.515425	-0.636621	-0.639826	0.102534	-0.0306202	0.235003	0.171237	0.332562	0.251754	0.26247	0.369704	0.294361	0.101708	0.0810145	0.422165	0.567881	0.421662	0.439329	0.435149	0.490432	0.419351	0.399928	0.431773	0.387119	0.505854	0.521646	0.527686	0.928909	0.970284	0.969246	0.983782	0.972411	0.985532	0.985712	0.983285	1	0.994385	0.990735	0.916583	0.964442	0.783425	0.639555	0.797866	0.695503	0.728893	0.768875	0.809618
L-a-Lysophosphatidylserine	-0.491857	-0.650536	-0.432945	-0.559857	-0.563646	0.0268197	-0.121531	0.153409	0.0840034	0.25112	0.165702	0.17587	0.296883	0.201261	0.0159197	-0.00765566	0.33703	0.490259	0.338075	0.357343	0.352342	0.408234	0.336506	0.31353	0.348513	0.304082	0.427662	0.439868	0.446653	0.925299	0.961092	0.959821	0.992439	0.984241	0.985539	0.979972	0.992004	0.994385	1	0.996598	0.884905	0.936237	0.724223	0.57482	0.737801	0.625946	0.66505	0.707922	0.753131
LysoPC(0:0/16:0)	-0.488732	-0.641136	-0.423242	-0.552066	-0.555819	0.0106625	-0.128343	0.153309	0.0795603	0.243266	0.157142	0.172492	0.277526	0.187229	-0.00202707	-0.0252997	0.315507	0.472977	0.319309	0.339046	0.334753	0.400755	0.319234	0.297545	0.336588	0.288419	0.414999	0.429133	0.440101	0.917194	0.953432	0.953136	0.984915	0.972679	0.993145	0.98149	0.989062	0.990735	0.996598	1	0.89331	0.931707	0.707549	0.568489	0.737785	0.619032	0.661275	0.704563	0.74767
LysoPC(18:0)	-0.609048	-0.869736	-0.720986	-0.801447	-0.805692	0.315935	0.306872	0.534347	0.483964	0.598094	0.562582	0.580399	0.44801	0.512021	0.341617	0.330513	0.585291	0.734723	0.620213	0.645785	0.64937	0.739006	0.659476	0.632523	0.671498	0.625781	0.724194	0.734725	0.753243	0.753782	0.841638	0.845561	0.88695	0.859598	0.914995	0.890904	0.836015	0.916583	0.884905	0.89331	1	0.969864	0.854524	0.836634	0.9362	0.878296	0.911199	0.931967	0.94867
LysoPC(16:1(9Z)/0:0)	-0.656033	-0.872729	-0.717529	-0.809114	-0.81317	0.327519	0.214042	0.448282	0.406223	0.56173	0.481315	0.500089	0.543767	0.521643	0.348637	0.33155	0.62627	0.756813	0.635254	0.654166	0.65099	0.69529	0.637795	0.621758	0.65117	0.612777	0.712096	0.723724	0.728404	0.860717	0.928154	0.932256	0.933049	0.912465	0.936917	0.936037	0.903442	0.964442	0.936237	0.931707	0.969864	1	0.907039	0.814022	0.924191	0.854313	0.866795	0.905895	0.927805
Methoxyzotepine	-0.785324	-0.975515	-0.920424	-0.958611	-0.9616	0.609389	0.475085	0.617841	0.630283	0.778559	0.678379	0.709431	0.828556	0.814905	0.677413	0.669421	0.88983	0.951173	0.884946	0.891473	0.885841	0.860656	0.854777	0.860851	0.87018	0.853981	0.907738	0.914635	0.903454	0.715949	0.788943	0.799809	0.720982	0.692993	0.71506	0.734414	0.681106	0.783425	0.724223	0.707549	0.854524	0.907039	1	0.916985	0.950866	0.934437	0.888628	0.94168	0.932027
13R-HODE	-0.650997	-0.970298	-0.944366	-0.941888	-0.944722	0.734247	0.679607	0.810246	0.817293	0.919159	0.851121	0.872276	0.730851	0.843536	0.781071	0.771226	0.874816	0.946469	0.906485	0.930962	0.929939	0.955204	0.93195	0.920207	0.946542	0.927957	0.956527	0.959879	0.966828	0.468785	0.576364	0.591203	0.597162	0.571603	0.584458	0.577248	0.495957	0.639555	0.57482	0.568489	0.836634	0.814022	0.916985	1	0.937899	0.978012	0.942481	0.958071	0.942375
LysoPC(18:1(9Z))	-0.727382	-0.971114	-0.902262	-0.953596	-0.956578	0.570881	0.537559	0.713841	0.69344	0.798799	0.747472	0.772384	0.687399	0.766656	0.62043	0.613016	0.806856	0.906838	0.82635	0.847461	0.847501	0.896916	0.843788	0.835597	0.858461	0.829028	0.891609	0.901369	0.906037	0.651874	0.749813	0.758019	0.738149	0.707038	0.769929	0.772814	0.685033	0.797866	0.737801	0.737785	0.9362	0.924191	0.950866	0.937899	1	0.96967	0.962301	0.987309	0.981942
MG(0:0/18:3(9Z,12Z,15Z)/0:0)	-0.653216	-0.981689	-0.941334	-0.955625	-0.959428	0.67602	0.682003	0.813102	0.809954	0.887876	0.857199	0.866614	0.700256	0.835627	0.728579	0.724695	0.868784	0.944778	0.893919	0.913734	0.916376	0.964701	0.925822	0.913476	0.931179	0.906286	0.944602	0.958252	0.965288	0.541021	0.642191	0.64969	0.636335	0.610786	0.646165	0.650416	0.557817	0.695503	0.625946	0.619032	0.878296	0.854313	0.934437	0.978012	0.96967	1	0.98159	0.98684	0.978897
LysoPE(18:3(9Z,12Z,15Z)/0:0)	-0.621187	-0.945993	-0.879848	-0.908001	-0.910928	0.582694	0.651233	0.778587	0.760678	0.824096	0.8392	0.837648	0.57622	0.745281	0.623183	0.621736	0.782223	0.881616	0.820398	0.842924	0.850268	0.924471	0.878296	0.852745	0.871237	0.839277	0.890766	0.903185	0.914758	0.546805	0.653985	0.656023	0.680089	0.656172	0.693999	0.692448	0.597837	0.728893	0.66505	0.661275	0.911199	0.866795	0.888628	0.942481	0.962301	0.98159	1	0.983609	0.988269
LysoPC(18:3(6Z,9Z,12Z))	-0.700128	-0.980378	-0.913594	-0.945775	-0.949843	0.580159	0.594311	0.7363	0.728392	0.821765	0.797022	0.815103	0.661369	0.774916	0.640121	0.63765	0.820536	0.919023	0.8531	0.871699	0.87585	0.923417	0.884895	0.868174	0.889272	0.860905	0.919177	0.925436	0.932928	0.60956	0.712825	0.719962	0.717306	0.685796	0.732966	0.725208	0.642588	0.768875	0.707922	0.704563	0.931967	0.905895	0.94168	0.958071	0.987309	0.98684	0.983609	1	0.993674
PC(18:3(9Z,12Z,15Z)/0:0)	-0.663597	-0.963998	-0.876509	-0.919126	-0.922952	0.537608	0.55177	0.710937	0.691458	0.785073	0.767144	0.774407	0.611093	0.725167	0.584845	0.580064	0.780982	0.888936	0.811513	0.833	0.837237	0.896691	0.8509	0.828943	0.851093	0.818803	0.883049	0.893339	0.90175	0.646346	0.746159	0.750089	0.764102	0.739594	0.771734	0.76911	0.691816	0.809618	0.753131	0.74767	0.94867	0.927805	0.932027	0.942375	0.981942	0.978897	0.988269	0.993674	1
LysoPC(18:3(9Z,12Z,15Z))	-0.653719	-0.959881	-0.876664	-0.918266	-0.922224	0.537586	0.568936	0.732221	0.709772	0.793857	0.781165	0.790258	0.594754	0.724784	0.586757	0.582497	0.769472	0.88216	0.805166	0.829557	0.83448	0.90467	0.851421	0.828134	0.853205	0.820663	0.883561	0.892152	0.903004	0.614251	0.71997	0.724588	0.748258	0.722218	0.76285	0.755039	0.671185	0.792761	0.73594	0.733537	0.949727	0.916078	0.918079	0.943775	0.983501	0.978969	0.989769	0.994769	0.997778
[truncated: 1 more columns]
