# Supplementary material for: Metabolite Support of Long-Term Storage of Sperm in the Spermatheca of Honeybee (Apis mellifera) Queens
Source: Front Physiol. 2020 Nov 10;11:574856. doi: 10.3389/fphys.2020.574856 (PMC7683436; doi:10.3389/fphys.2020.574856)
Supplement: Supplementary Table 5 — Metabolic pathway enrichment analysis. [file Table_5.XLSX]

## Sheet: NLQS_VQS (p-value↓）
ID Annotation	Annotation	in set	set	in background	background	RichFactor	p-value	-lg(p-value)	FDR correction	Matching IDs	URL
ame00230	Purine metabolism	13	115	95	3244	0.136842	2.1276e-05	4.67211	0.000776574	C00020 C00147 C00242 C00262 C00286 C00294 C00361 C00366 C00387 C03483 C03794 C04734 C05512	https://www.genome.jp/kegg-bin/show_pathway?ame00230/ame:C00020%09red/ame:C00147%09red/ame:C00242%09blue/ame:C00262%09red/ame:C00286%09red/ame:C00294%09red/ame:C00361%09red/ame:C00366%09blue/ame:C00387%09red/ame:C03483%09blue/ame:C03794%09blue/ame:C04734%09red/ame:C05512%09blue
ame02010	ABC transporters	13	115	126	3244	0.103175	0.000410312	3.38689	0.00998426	C00025 C00047 C00062 C00093 C00114 C00121 C00140 C00208 C00243 C00407 C00719 C01487 C01835	https://www.genome.jp/kegg-bin/show_pathway?ame02010/ame:C00025%09blue/ame:C00047%09red/ame:C00062%09red/ame:C00093%09blue/ame:C00114%09red/ame:C00121%09blue/ame:C00140%09blue/ame:C00208%09blue/ame:C00243%09blue/ame:C00407%09red/ame:C00719%09red/ame:C01487%09red/ame:C01835%09blue
ame00310	Lysine degradation	8	115	55	3244	0.145455	0.000590325	3.22891	0.0107734	C00042 C00047 C00322 C00408 C00489 C02727 C03196 C03793	https://www.genome.jp/kegg-bin/show_pathway?ame00310/ame:C00042%09blue/ame:C00047%09red/ame:C00322%09blue/ame:C00408%09red/ame:C00489%09blue/ame:C02727%09blue/ame:C03196%09red/ame:C03793%09blue
ame00564	Glycerophospholipid metabolism	7	115	52	3244	0.134615	0.0020888	2.6801	0.0304965	C00093 C00114 C00157 C00350 C00588 C00670 C04230	https://www.genome.jp/kegg-bin/show_pathway?ame00564/ame:C00093%09blue/ame:C00114%09red/ame:C00157%09blue/ame:C00350%09blue/ame:C00588%09red/ame:C00670%09red/ame:C04230%09red
ame00250	Alanine, aspartate and glutamate metabolism	5	115	28	3244	0.178571	0.00262307	2.58119	0.031914	C00025 C00042 C00158 C00352 C03794	https://www.genome.jp/kegg-bin/show_pathway?ame00250/ame:C00025%09blue/ame:C00042%09blue/ame:C00158%09blue/ame:C00352%09blue/ame:C03794%09blue
ame01230	Biosynthesis of amino acids	11	115	128	3244	0.0859375	0.00503478	2.29802	0.0525055	C00025 C00047 C00062 C00078 C00082 C00158 C00197 C00322 C00407 C00944 C06007	https://www.genome.jp/kegg-bin/show_pathway?ame01230/ame:C00025%09blue/ame:C00047%09red/ame:C00062%09red/ame:C00078%09red/ame:C00082%09red/ame:C00158%09blue/ame:C00197%09blue/ame:C00322%09blue/ame:C00407%09red/ame:C00944%09blue/ame:C06007%09red
ame01210	2-Oxocarboxylic acid metabolism	11	115	134	3244	0.0820896	0.00710775	2.14827	0.0578647	C00025 C00047 C00078 C00082 C00158 C00322 C00407 C01180 C03219 C06007 C17213	https://www.genome.jp/kegg-bin/show_pathway?ame01210/ame:C00025%09blue/ame:C00047%09red/ame:C00078%09red/ame:C00082%09red/ame:C00158%09blue/ame:C00322%09blue/ame:C00407%09red/ame:C01180%09blue/ame:C03219%09red/ame:C06007%09red/ame:C17213%09red
ame04150	mTOR signaling pathway	2	115	4	3244	0.5	0.007134	2.14667	0.0578647	C00020 C00062	https://www.genome.jp/kegg-bin/show_pathway?ame04150/ame:C00020%09red/ame:C00062%09red
ame00970	Aminoacyl-tRNA biosynthesis	6	115	52	3244	0.115385	0.00936532	2.02848	0.0598275	C00025 C00047 C00062 C00078 C00082 C00407	https://www.genome.jp/kegg-bin/show_pathway?ame00970/ame:C00025%09blue/ame:C00047%09red/ame:C00062%09red/ame:C00078%09red/ame:C00082%09red/ame:C00407%09red
ame04080	Neuroactive ligand-receptor interaction	6	115	52	3244	0.115385	0.00936532	2.02848	0.0598275	C00025 C00388 C00788 C01516 C02166 C04598	https://www.genome.jp/kegg-bin/show_pathway?ame04080/ame:C00025%09blue/ame:C00388%09red/ame:C00788%09red/ame:C01516%09blue/ame:C02166%09red/ame:C04598%09red
ame00600	Sphingolipid metabolism	4	115	25	3244	0.16	0.0106542	1.97248	0.0598275	C00319 C00550 C06125 C12144	https://www.genome.jp/kegg-bin/show_pathway?ame00600/ame:C00319%09red/ame:C00550%09red/ame:C06125%09red/ame:C12144%09blue
ame00565	Ether lipid metabolism	4	115	25	3244	0.16	0.0106542	1.97248	0.0598275	C00670 C04317 C04598 C15646	https://www.genome.jp/kegg-bin/show_pathway?ame00565/ame:C00670%09red/ame:C04317%09red/ame:C04598%09red/ame:C15646%09red
ame04068	FoxO signaling pathway	2	115	5	3244	0.4	0.0116152	1.93497	0.0605652	C00020 C00025	https://www.genome.jp/kegg-bin/show_pathway?ame04068/ame:C00020%09red/ame:C00025%09blue
ame00630	Glyoxylate and dicarboxylate metabolism	6	115	62	3244	0.0967742	0.0212493	1.67266	0.103413	C00025 C00042 C00149 C00158 C00197 C01732	https://www.genome.jp/kegg-bin/show_pathway?ame00630/ame:C00025%09blue/ame:C00042%09blue/ame:C00149%09blue/ame:C00158%09blue/ame:C00197%09blue/ame:C01732%09blue
ame00740	Riboflavin metabolism	3	115	20	3244	0.15	0.0318691	1.49663	0.13685	C00016 C00255 C05995	https://www.genome.jp/kegg-bin/show_pathway?ame00740/ame:C00016%09red/ame:C00255%09red/ame:C05995%09blue
ame00020	Citrate cycle (TCA cycle)	3	115	20	3244	0.15	0.0318691	1.49663	0.13685	C00042 C00149 C00158	https://www.genome.jp/kegg-bin/show_pathway?ame00020/ame:C00042%09blue/ame:C00149%09blue/ame:C00158%09blue
ame00360	Phenylalanine metabolism	6	115	72	3244	0.0833333	0.0406547	1.39089	0.164878	C00042 C00082 C00423 C00582 C01772 C05598	https://www.genome.jp/kegg-bin/show_pathway?ame00360/ame:C00042%09blue/ame:C00082%09red/ame:C00423%09red/ame:C00582%09red/ame:C01772%09red/ame:C05598%09blue
ame00350	Tyrosine metabolism	6	115	78	3244	0.0769231	0.0564188	1.24858	0.216767	C00042 C00082 C00628 C00788 C05595 C06201	https://www.genome.jp/kegg-bin/show_pathway?ame00350/ame:C00042%09blue/ame:C00082%09red/ame:C00628%09blue/ame:C00788%09red/ame:C05595%09blue/ame:C06201%09blue
ame00471	D-Glutamine and D-glutamate metabolism	2	115	13	3244	0.153846	0.0753252	1.12306	0.274937	C00025 C00819	https://www.genome.jp/kegg-bin/show_pathway?ame00471/ame:C00025%09blue/ame:C00819%09red
ame00340	Histidine metabolism	4	115	47	3244	0.0851064	0.0832154	1.0798	0.288224	C00025 C00388 C05565 C20522	https://www.genome.jp/kegg-bin/show_pathway?ame00340/ame:C00025%09blue/ame:C00388%09red/ame:C05565%09red/ame:C20522%09red
ame00620	Pyruvate metabolism	3	115	31	3244	0.0967742	0.0951472	1.0216	0.288224	C00042 C00149 C03451	https://www.genome.jp/kegg-bin/show_pathway?ame00620/ame:C00042%09blue/ame:C00149%09blue/ame:C03451%09red
ame00260	Glycine, serine and threonine metabolism	4	115	50	3244	0.08	0.0992604	1.00322	0.288224	C00078 C00114 C00197 C00719	https://www.genome.jp/kegg-bin/show_pathway?ame00260/ame:C00078%09red/ame:C00114%09red/ame:C00197%09blue/ame:C00719%09red
ame01200	Carbon metabolism	7	115	112	3244	0.0625	0.100133	0.999423	0.288224	C00025 C00042 C00149 C00158 C00197 C00445 C01732	https://www.genome.jp/kegg-bin/show_pathway?ame01200/ame:C00025%09blue/ame:C00042%09blue/ame:C00149%09blue/ame:C00158%09blue/ame:C00197%09blue/ame:C00445%09red/ame:C01732%09blue
ame00563	Glycosylphosphatidylinositol (GPI)-anchor biosynthesis	1	115	3	3244	0.333333	0.102655	0.988619	0.288224	C00350	https://www.genome.jp/kegg-bin/show_pathway?ame00563/ame:C00350%09blue
ame04136	Autophagy - other	1	115	3	3244	0.333333	0.102655	0.988619	0.288224	C00350	https://www.genome.jp/kegg-bin/show_pathway?ame04136/ame:C00350%09blue
ame00190	Oxidative phosphorylation	2	115	16	3244	0.125	0.108255	0.965551	0.29269	C00003 C00042	https://www.genome.jp/kegg-bin/show_pathway?ame00190/ame:C00003%09blue/ame:C00042%09blue
ame00400	Phenylalanine, tyrosine and tryptophan biosynthesis	3	115	35	3244	0.0857143	0.125397	0.901714	0.326927	C00078 C00082 C00944	https://www.genome.jp/kegg-bin/show_pathway?ame00400/ame:C00078%09red/ame:C00082%09red/ame:C00944%09blue
ame04140	Autophagy - animal	1	115	4	3244	0.25	0.134496	0.871292	0.338558	C00350	https://www.genome.jp/kegg-bin/show_pathway?ame04140/ame:C00350%09blue
ame00480	Glutathione metabolism	3	115	38	3244	0.0789474	0.150064	0.823723	0.353377	C00025 C00072 C00127	https://www.genome.jp/kegg-bin/show_pathway?ame00480/ame:C00025%09blue/ame:C00072%09red/ame:C00127%09red
ame00561	Glycerolipid metabolism	3	115	38	3244	0.0789474	0.150064	0.823723	0.353377	C00093 C00197 C00422	https://www.genome.jp/kegg-bin/show_pathway?ame00561/ame:C00093%09blue/ame:C00197%09blue/ame:C00422%09red
ame00380	Tryptophan metabolism	5	115	81	3244	0.0617284	0.157922	0.801557	0.36026	C00078 C00322 C01717 C02700 C05635	https://www.genome.jp/kegg-bin/show_pathway?ame00380/ame:C00078%09red/ame:C00322%09blue/ame:C01717%09blue/ame:C02700%09blue/ame:C05635%09blue
ame00220	Arginine biosynthesis	2	115	23	3244	0.0869565	0.195186	0.709551	0.419076	C00025 C00062	https://www.genome.jp/kegg-bin/show_pathway?ame00220/ame:C00025%09blue/ame:C00062%09red
ame00290	Valine, leucine and isoleucine biosynthesis	2	115	23	3244	0.0869565	0.195186	0.709551	0.419076	C00407 C06007	https://www.genome.jp/kegg-bin/show_pathway?ame00290/ame:C00407%09red/ame:C06007%09red
ame00510	N-Glycan biosynthesis	1	115	7	3244	0.142857	0.22345	0.65082	0.466052	C00110	https://www.genome.jp/kegg-bin/show_pathway?ame00510/ame:C00110%09blue
ame00770	Pantothenate and CoA biosynthesis	2	115	28	3244	0.0714286	0.261358	0.582765	0.523722	C02642 C04352	https://www.genome.jp/kegg-bin/show_pathway?ame00770/ame:C02642%09blue/ame:C04352%09red
ame00590	Arachidonic acid metabolism	4	115	75	3244	0.0533333	0.274449	0.561538	0.523722	C00157 C00219 C02166 C13809	https://www.genome.jp/kegg-bin/show_pathway?ame00590/ame:C00157%09blue/ame:C00219%09blue/ame:C02166%09red/ame:C13809%09blue
ame00670	One carbon pool by folate	1	115	9	3244	0.111111	0.277654	0.556495	0.523722	C00445	https://www.genome.jp/kegg-bin/show_pathway?ame00670/ame:C00445%09red
ame00983	Drug metabolism - other enzymes	3	115	52	3244	0.0576923	0.279797	0.553157	0.523722	C00003 C11173 C12650	https://www.genome.jp/kegg-bin/show_pathway?ame00983/ame:C00003%09blue/ame:C11173%09red/ame:C12650%09blue
ame00330	Arginine and proline metabolism	4	115	78	3244	0.0512821	0.298576	0.524944	0.5365	C00025 C00062 C01035 C01043	https://www.genome.jp/kegg-bin/show_pathway?ame00330/ame:C00025%09blue/ame:C00062%09red/ame:C01035%09blue/ame:C01043%09blue
ame00730	Thiamine metabolism	2	115	31	3244	0.0645161	0.301322	0.520969	0.5365	C00003 C00082	https://www.genome.jp/kegg-bin/show_pathway?ame00730/ame:C00003%09blue/ame:C00082%09red
ame04745	Phototransduction - fly	1	115	11	3244	0.0909091	0.328106	0.483986	0.57028	C00219	https://www.genome.jp/kegg-bin/show_pathway?ame04745/ame:C00219%09blue
ame00030	Pentose phosphate pathway	2	115	35	3244	0.0571429	0.353996	0.451002	0.600969	C00121 C00197	https://www.genome.jp/kegg-bin/show_pathway?ame00030/ame:C00121%09blue/ame:C00197%09blue
ame00240	Pyrimidine metabolism	3	115	65	3244	0.0461538	0.407263	0.390125	0.669783	C00214 C00337 C02642	https://www.genome.jp/kegg-bin/show_pathway?ame00240/ame:C00214%09blue/ame:C00337%09red/ame:C02642%09blue
ame00130	Ubiquinone and other terpenoid-quinone biosynthesis	4	115	92	3244	0.0434783	0.41288	0.384176	0.669783	C00082 C00423 C13309 C17559	https://www.genome.jp/kegg-bin/show_pathway?ame00130/ame:C00082%09red/ame:C00423%09red/ame:C13309%09red/ame:C17559%09blue
ame00650	Butanoate metabolism	2	115	42	3244	0.047619	0.442426	0.35416	0.70211	C00025 C00042	https://www.genome.jp/kegg-bin/show_pathway?ame00650/ame:C00025%09blue/ame:C00042%09blue
ame00592	alpha-Linolenic acid metabolism	2	115	44	3244	0.0454545	0.466495	0.331153	0.724556	C00157 C06427	https://www.genome.jp/kegg-bin/show_pathway?ame00592/ame:C00157%09blue/ame:C06427%09red
ame00052	Galactose metabolism	2	115	46	3244	0.0434783	0.489949	0.30985	0.726031	C00243 C01697	https://www.genome.jp/kegg-bin/show_pathway?ame00052/ame:C00243%09blue/ame:C01697%09red
ame01040	Biosynthesis of unsaturated fatty acids	3	115	74	3244	0.0405405	0.491939	0.308088	0.726031	C00219 C06427 C16522	https://www.genome.jp/kegg-bin/show_pathway?ame01040/ame:C00219%09blue/ame:C06427%09red/ame:C16522%09red
ame00910	Nitrogen metabolism	1	115	19	3244	0.0526316	0.497281	0.303398	0.726031	C00025	https://www.genome.jp/kegg-bin/show_pathway?ame00910/ame:C00025%09blue
ame00430	Taurine and hypotaurine metabolism	1	115	22	3244	0.0454545	0.549181	0.260284	0.770966	C00025	https://www.genome.jp/kegg-bin/show_pathway?ame00430/ame:C00025%09blue
ame00232	Caffeine metabolism	1	115	22	3244	0.0454545	0.549181	0.260284	0.770966	C16357	https://www.genome.jp/kegg-bin/show_pathway?ame00232/ame:C16357%09blue
ame00760	Nicotinate and nicotinamide metabolism	2	115	55	3244	0.0363636	0.587189	0.231222	0.80877	C00003 C00042	https://www.genome.jp/kegg-bin/show_pathway?ame00760/ame:C00003%09blue/ame:C00042%09blue
ame00780	Biotin metabolism	1	115	28	3244	0.0357143	0.637572	0.195471	0.848015	C00047	https://www.genome.jp/kegg-bin/show_pathway?ame00780/ame:C00047%09red
ame00270	Cysteine and methionine metabolism	2	115	61	3244	0.0327869	0.644103	0.191044	0.848015	C01180 C02989	https://www.genome.jp/kegg-bin/show_pathway?ame00270/ame:C01180%09blue/ame:C02989%09blue
ame04070	Phosphatidylinositol signaling system	1	115	29	3244	0.0344828	0.650532	0.186731	0.848015	C01220	https://www.genome.jp/kegg-bin/show_pathway?ame04070/ame:C01220%09blue
ame00010	Glycolysis / Gluconeogenesis	1	115	31	3244	0.0322581	0.67509	0.170639	0.863547	C00197	https://www.genome.jp/kegg-bin/show_pathway?ame00010/ame:C00197%09blue
ame00410	beta-Alanine metabolism	1	115	32	3244	0.03125	0.686719	0.163221	0.863547	C02642	https://www.genome.jp/kegg-bin/show_pathway?ame00410/ame:C02642%09blue
ame00920	Sulfur metabolism	1	115	33	3244	0.030303	0.697935	0.156185	0.863547	C00042	https://www.genome.jp/kegg-bin/show_pathway?ame00920/ame:C00042%09blue
ame00500	Starch and sucrose metabolism	1	115	37	3244	0.027027	0.738957	0.131381	0.899064	C00208	https://www.genome.jp/kegg-bin/show_pathway?ame00500/ame:C00208%09blue
ame00280	Valine, leucine and isoleucine degradation	1	115	42	3244	0.0238095	0.782547	0.106489	0.912003	C00407	https://www.genome.jp/kegg-bin/show_pathway?ame00280/ame:C00407%09red
ame00562	Inositol phosphate metabolism	1	115	47	3244	0.0212766	0.818912	0.0867629	0.912003	C01220	https://www.genome.jp/kegg-bin/show_pathway?ame00562/ame:C01220%09blue
ame00982	Drug metabolism - cytochrome P450	2	115	87	3244	0.0229885	0.822276	0.0849822	0.912003	C01516 C16658	https://www.genome.jp/kegg-bin/show_pathway?ame00982/ame:C01516%09blue/ame:C16658%09blue
ame00640	Propanoate metabolism	1	115	48	3244	0.0208333	0.825426	0.0833221	0.912003	C00042	https://www.genome.jp/kegg-bin/show_pathway?ame00640/ame:C00042%09blue
ame00053	Ascorbate and aldarate metabolism	1	115	49	3244	0.0204082	0.831707	0.0800295	0.912003	C00072	https://www.genome.jp/kegg-bin/show_pathway?ame00053/ame:C00072%09red
ame00071	Fatty acid degradation	1	115	50	3244	0.02	0.837765	0.0768779	0.912003	C00489	https://www.genome.jp/kegg-bin/show_pathway?ame00071/ame:C00489%09blue
ame00100	Steroid biosynthesis	1	115	50	3244	0.02	0.837765	0.0768779	0.912003	C00751	https://www.genome.jp/kegg-bin/show_pathway?ame00100/ame:C00751%09blue
ame00051	Fructose and mannose metabolism	1	115	54	3244	0.0185185	0.859908	0.0655481	0.912003	C01487	https://www.genome.jp/kegg-bin/show_pathway?ame00051/ame:C01487%09red
ame00040	Pentose and glucuronate interconversions	1	115	55	3244	0.0181818	0.864958	0.0630049	0.912003	C03033	https://www.genome.jp/kegg-bin/show_pathway?ame00040/ame:C03033%09blue
ame00790	Folate biosynthesis	1	115	57	3244	0.0175439	0.874524	0.0582284	0.912003	C04874	https://www.genome.jp/kegg-bin/show_pathway?ame00790/ame:C04874%09blue
ame00520	Amino sugar and nucleotide sugar metabolism	2	115	108	3244	0.0185185	0.903085	0.0442715	0.928524	C00140 C00352	https://www.genome.jp/kegg-bin/show_pathway?ame00520/ame:C00140%09blue/ame:C00352%09blue
ame00860	Porphyrin and chlorophyll metabolism	2	115	142	3244	0.0140845	0.965808	0.0151092	0.979222	C00025 C00931	https://www.genome.jp/kegg-bin/show_pathway?ame00860/ame:C00025%09blue/ame:C00931%09blue
ame00980	Metabolism of xenobiotics by cytochrome P450	1	115	121	3244	0.00826446	0.988342	0.00509296	0.988342	C14854	https://www.genome.jp/kegg-bin/show_pathway?ame00980/ame:C14854%09blue
